# Supplementary material for: Distinguishable Prognostic miRNA Signatures of Head and Neck Squamous Cell Cancer With or Without HPV Infection
Source: PubMed Central journal article supplement (PMC7902765; doi:10.3389/fonc.2020.614487), 2021-02-10
Supplement: DataSheet_1.pdf [file DataSheet_1.pdf]

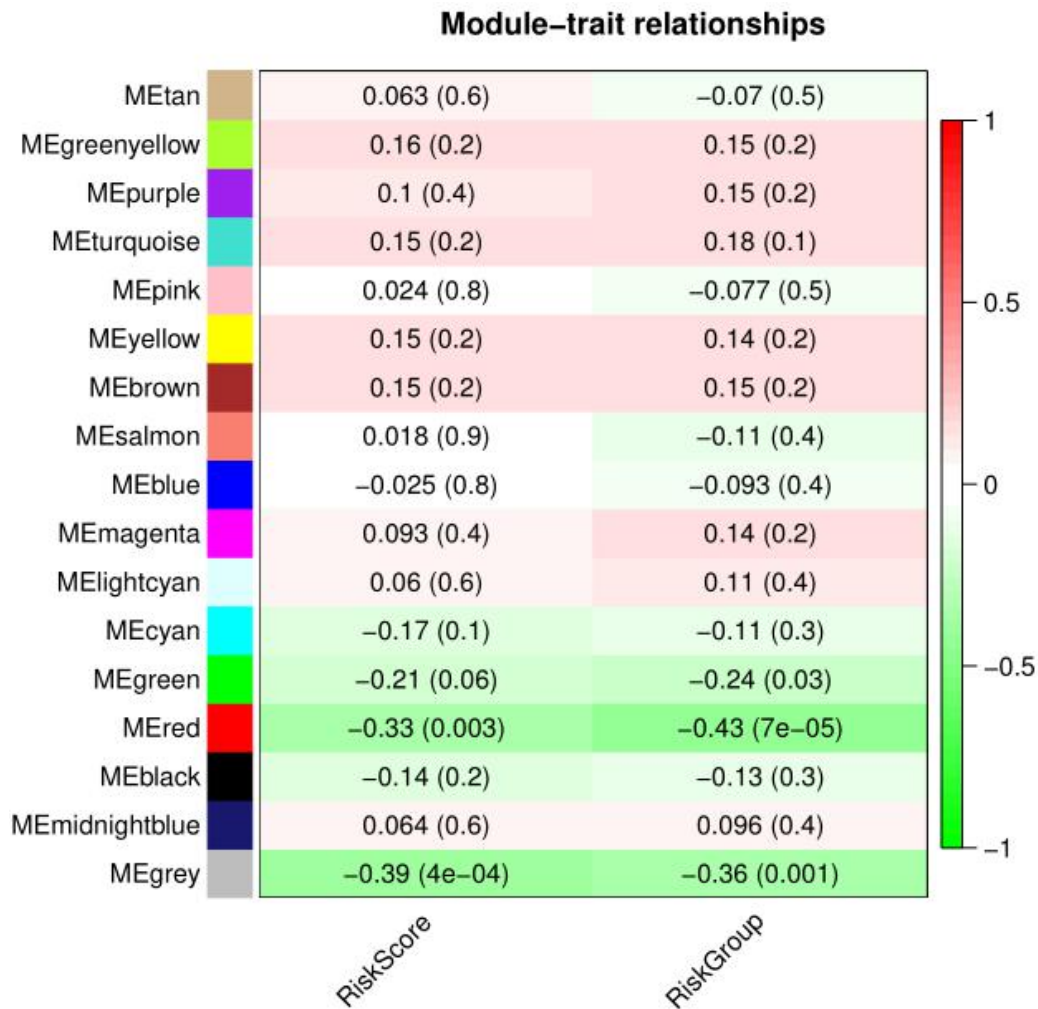

**FigureS1 WCGNA to identify modules related with risk score and risk group.** Differentially expressed genes between HPV+ and normal-adjacent tissues were used to perform WCGNA. We identified MEred module significantly associated with both risk score and risk group for further enrichment analysis.

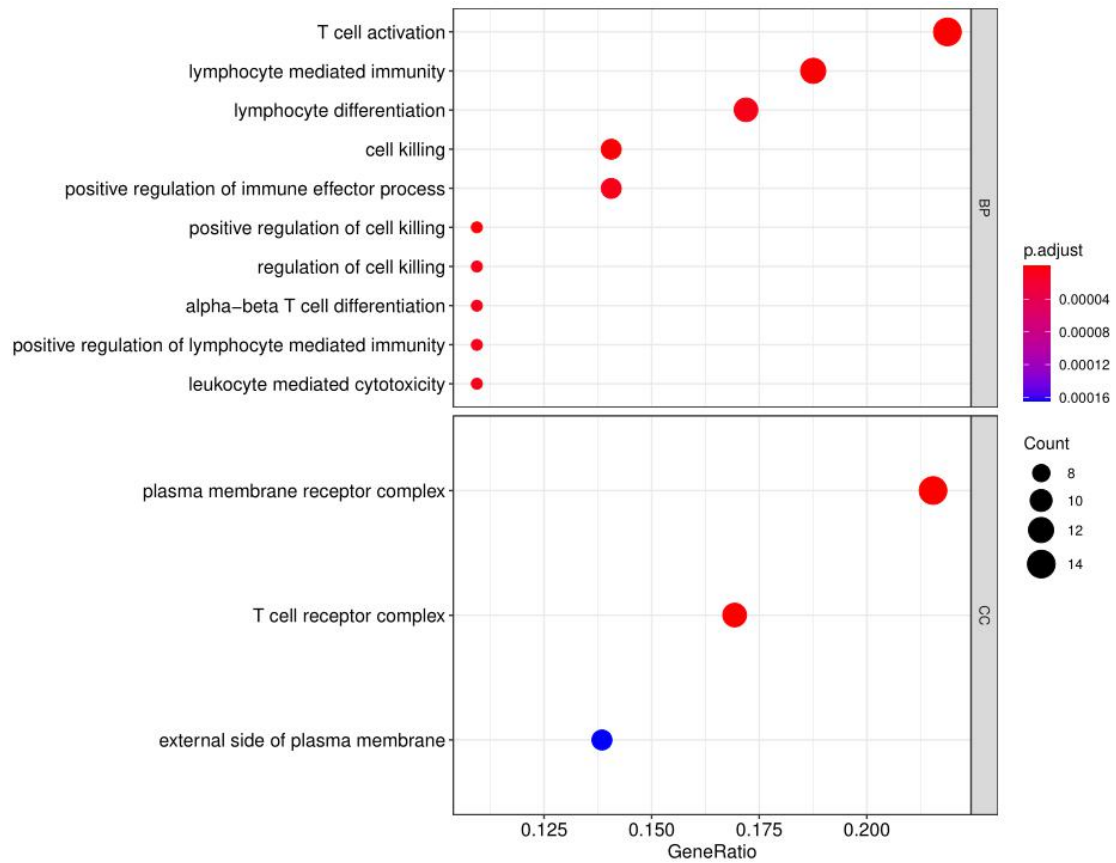

**FigureS2 GO enrichment analysis of risk-related MERed module.**

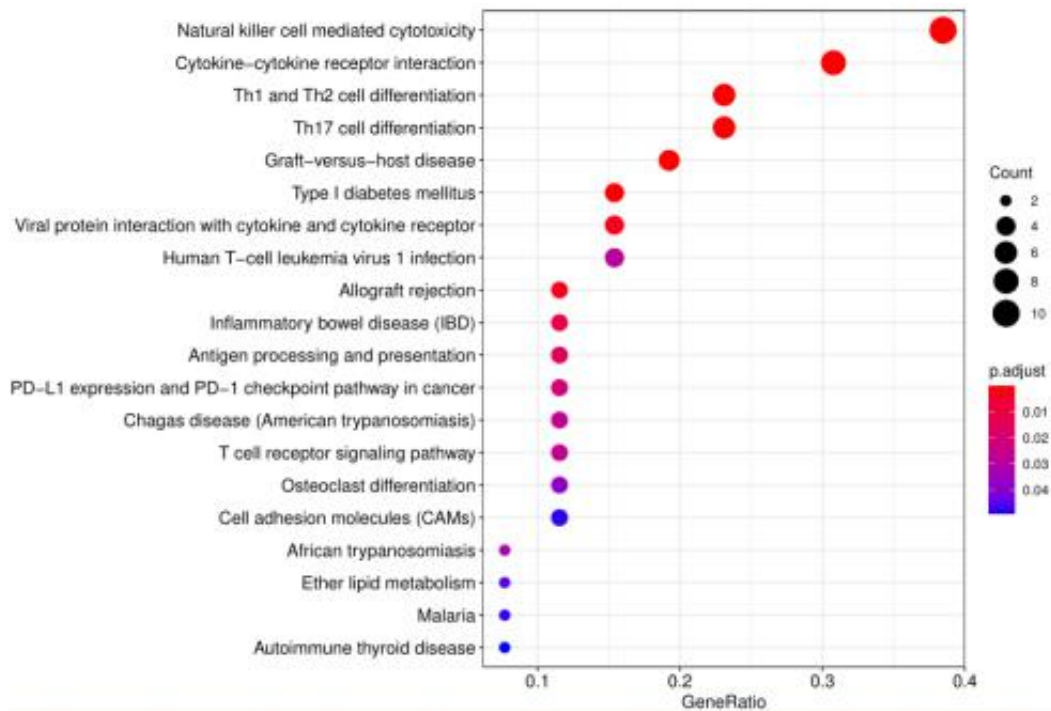

**FigureS3 KEGG enrichment analysis of risk-related MERed module.**
